# Supplementary material for: Novel high reactive bifunctional five- and six-membered bicyclic dicarbonate – synthesis and characterisation
Source: Royal Society of Chemistry journal article supplement (doi:10.1039/c8ra00669e), 2018-01-01
Supplement: c8ra00669e1.pdf [file c8ra00669e1.pdf]

## ELECTRONICAL SUPPLEMENTARY MATERIALS

for

### **Novel high reactive bifunctional five- and six-membered bicyclic dicarbonate – synthesis and characterisation**

Mariusz Tryznowski<sup>a, \*</sup> and Aleksandra Świdarska<sup>b</sup>

<sup>a</sup> Faculty of Production Engineering, Warsaw Univeristy of Technology, Narbutta 85, 02-524  
Warsaw, Poland

<sup>b</sup> Faculty of Chemistry, Warsaw University of Technology, Noakowskiego 3, 00-664 Warsaw,  
Poland

\*e-mail: [m.tryznowski@wip.pw.edu.pl](mailto:m.tryznowski@wip.pw.edu.pl)

Table of contents:

**Table 1S.** Crystal data and structure refinement for  $\alpha,\beta$ -diglycerol dicarbonate (56BCC)

**Figure 1S**  $^1\text{H}$ - $^1\text{H}$  COSY of 56BCC

**Figure 2S**  $^1\text{H}$ - $^{13}\text{C}$  HMBC of 56BCC

**Figure 3S**  $^1\text{H}$ - $^{13}\text{C}$  HQSC of 56BCC

**Figure 4S**  $^1\text{H}$  NMR of polycarbonate

**Figure 5S**  $^{13}\text{C}$  NMR of polycarbonate

**Figure 6S** Maldi-ToF of polycarbonate

**Figure 7S** FT-IR of PHU formation

**Table 1S.** Crystal data and structure refinement for  $\alpha,\beta$ -diglycerol dicarbonate, 56BCC

|                        |                                               |                           |
|------------------------|-----------------------------------------------|---------------------------|
| Identification code    | MTAS_MON1                                     |                           |
| Chemical formula       | C <sub>8</sub> H <sub>10</sub> O <sub>7</sub> |                           |
| Formula weight         | 218.16                                        |                           |
| Temperature            | 100(2) K                                      |                           |
| Wavelength             | 1.54178 Å                                     |                           |
| Crystal size           | 0.199 x 0.281 x 0.298 mm                      |                           |
| Crystal habit          | colorless prism                               |                           |
| Crystal system         | Monoclinic                                    |                           |
| Space group            | P1 21/c 1                                     |                           |
| Unit cell dimensions   | a = 10.5437(12) Å                             | $\alpha = 90^\circ$       |
|                        | b = 8.0245(9) Å                               | $\beta = 93.598(2)^\circ$ |
|                        | c = 10.8487(12) Å                             | $\gamma = 90^\circ$       |
| Volume                 | 916.08(18) Å <sup>3</sup>                     |                           |
| Z                      | 4                                             |                           |
| Density (calculated)   | 1.582 g/cm <sup>3</sup>                       |                           |
| Absorption coefficient | 1.246 mm <sup>-1</sup>                        |                           |
| F(000)                 | 456                                           |                           |

|                                      |                                                     |  |
|--------------------------------------|-----------------------------------------------------|--|
| Diffractometer                       | Bruker D8 VENTURE PHOTON 100 CMOS                   |  |
| Radiation source                     | INCOATEC I $\mu$ S micro-focus source, CuK $\alpha$ |  |
| Theta range for data collection      | 6.87 to 67.46 deg                                   |  |
| Index ranges                         | -12 ≤ h ≤ 12, -9 ≤ k ≤ 9, -12 ≤ l ≤ 12              |  |
| Reflections collected / unique       | 10146 / 1641 [R(int) = 0.0251]                      |  |
| Completeness to theta = 28.00        | 99.6%                                               |  |
| Absorption correction                | Multi-scan                                          |  |
| Max. and min. transmission           | 0.7900 and 0.7080                                   |  |
| Refinement method                    | Full-matrix least-squares on F <sup>2</sup>         |  |
| Data / restraints / parameters       | 1641 / 49 / 194                                     |  |
| Goodness-of-fit on F <sup>2</sup>    | 1.193                                               |  |
| Final R indices [I > 2 $\sigma$ (I)] | R1 = 0.0332, wR2 = 0.0844                           |  |
| R indices (all data)                 | R1 = 0.0340, wR2 = 0.0851                           |  |
| Largest diff. peak and hole          | 0.284 and -0.182 eÅ <sup>-3</sup>                   |  |
| R.M.S. deviation from mean           | 0.039 eÅ <sup>-3</sup>                              |  |

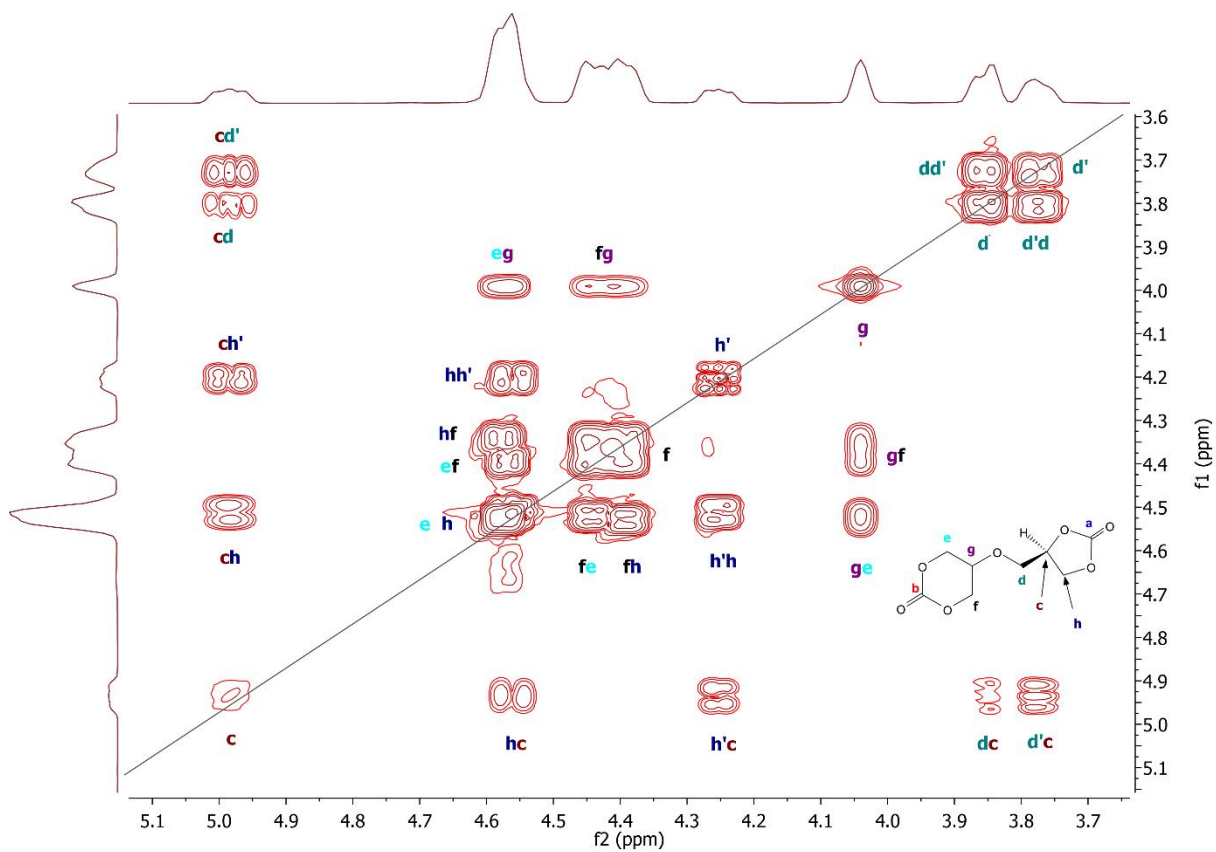

Figure 1S  $^1\text{H}$ - $^1\text{H}$  COSY of 56BCC

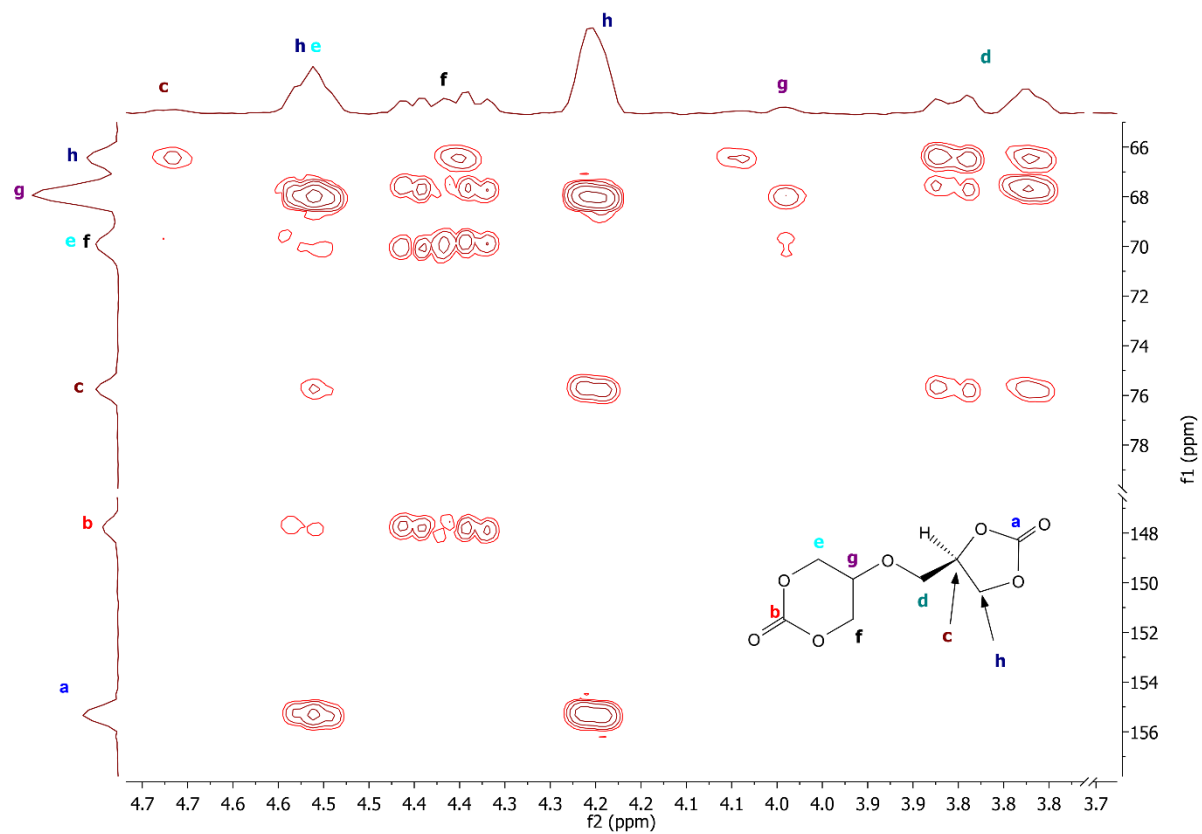

Figure 2S  $^1\text{H}$ - $^{13}\text{C}$  HMBC of 56BCC

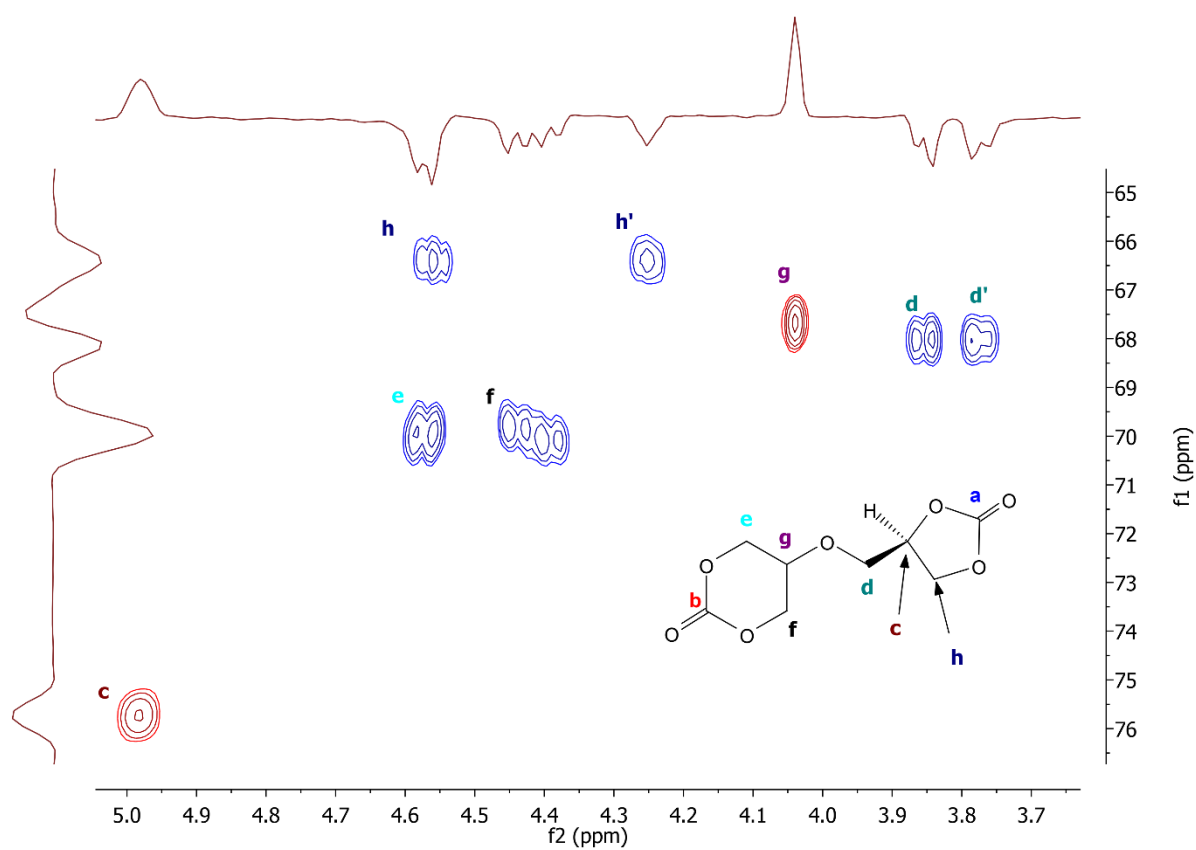

**Figure 3S**  $^1\text{H}$ - $^{13}\text{C}$  HMQSC of 56BCC

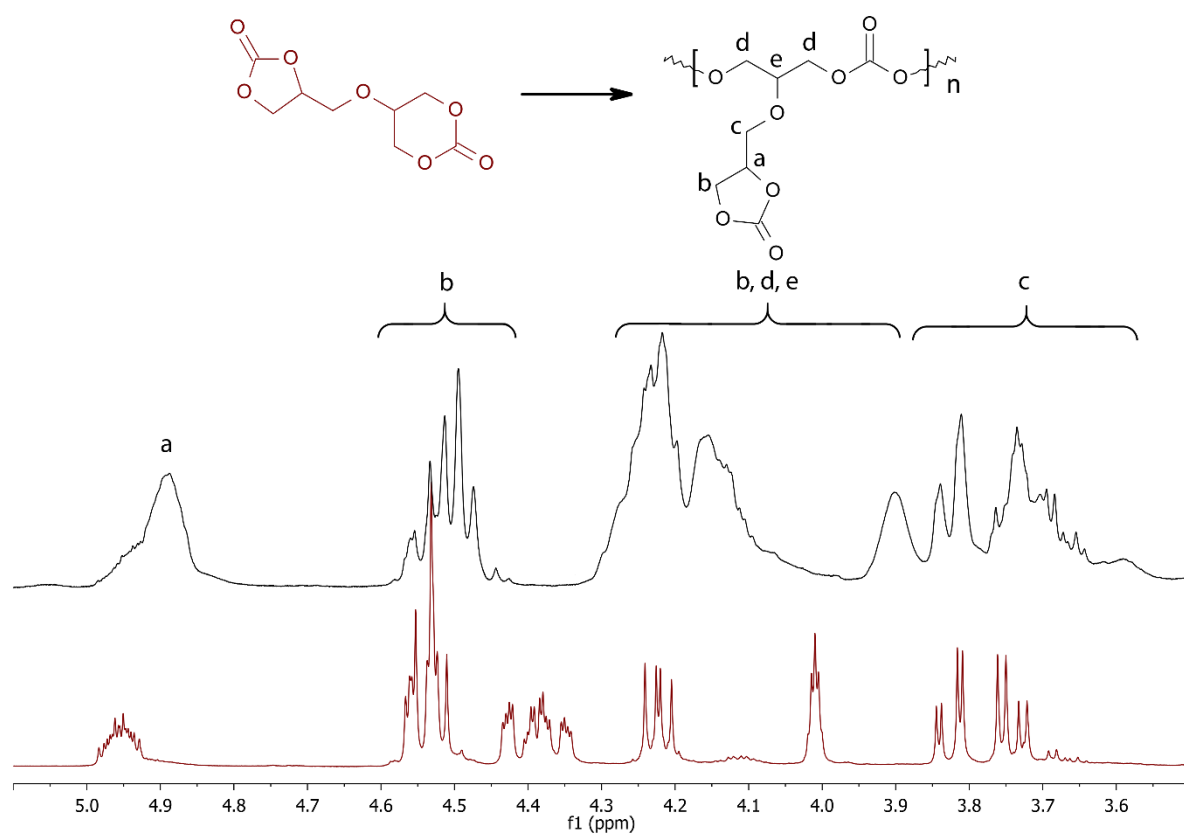

**Figure 4S**  $^1\text{H}$  NMR of polycarbonate

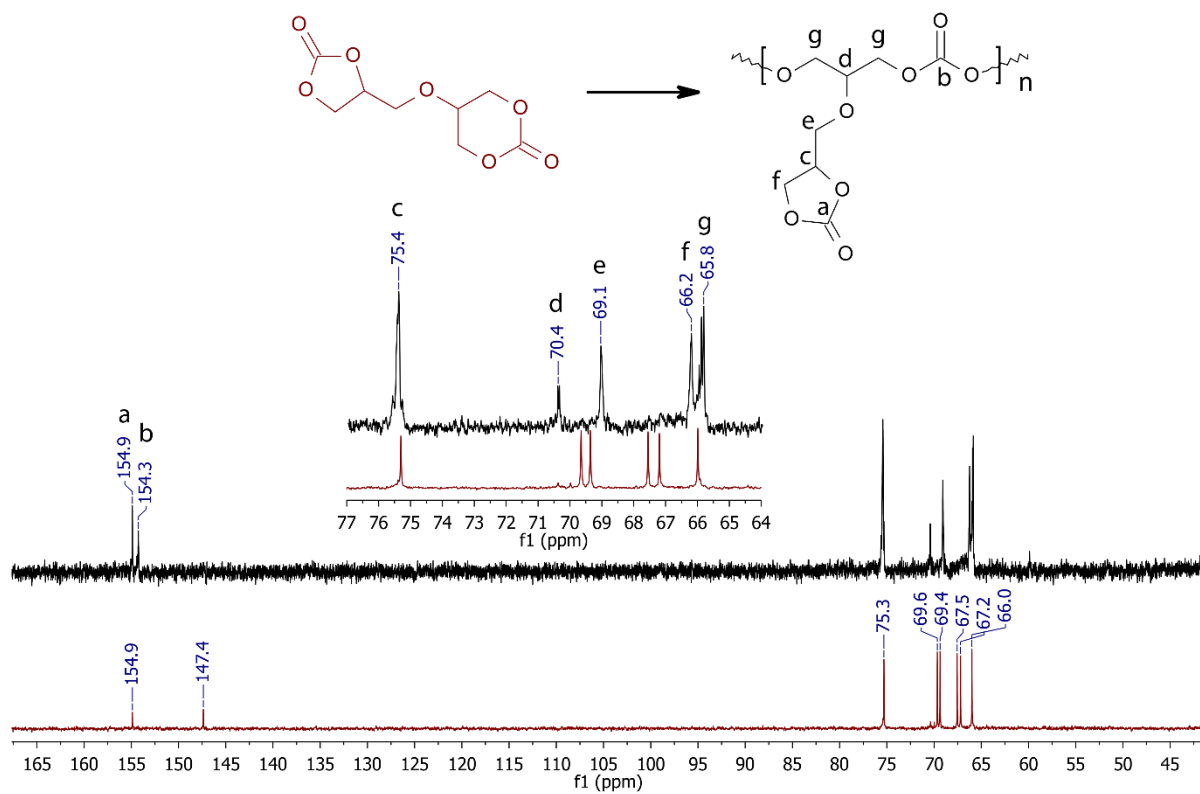

Figure 5S  $^{13}\text{C}$  NMR of polycarbonate

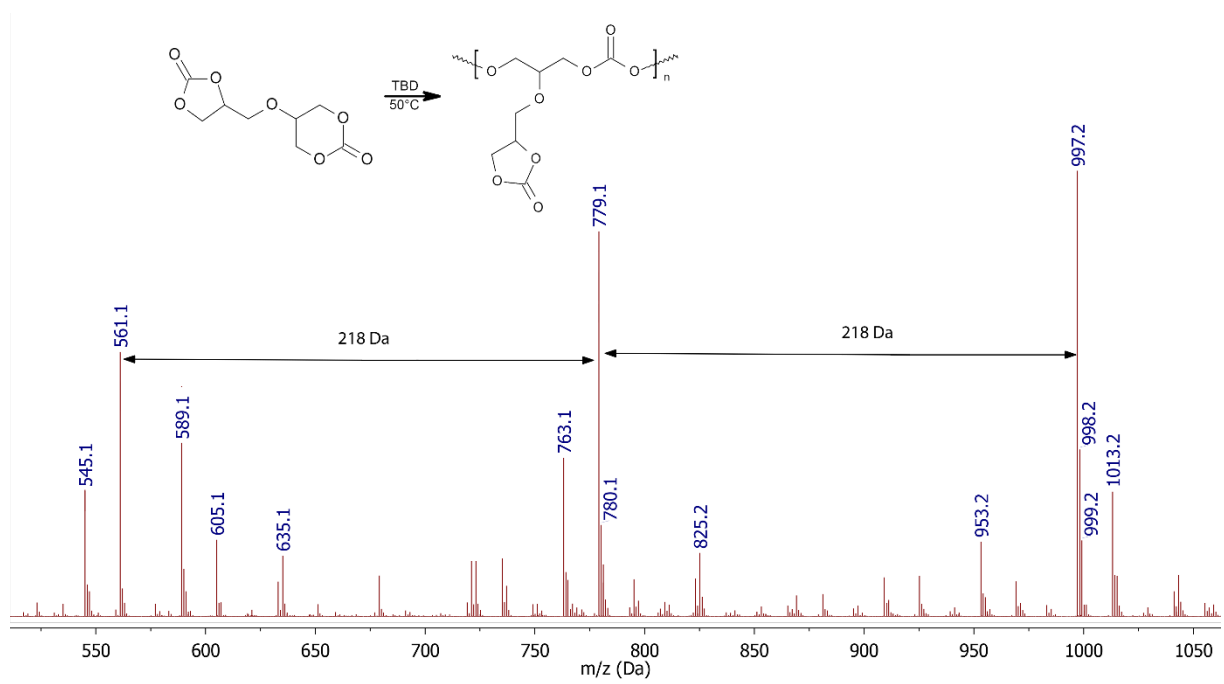

Figure 6S Maldi-ToF of polycarbonate



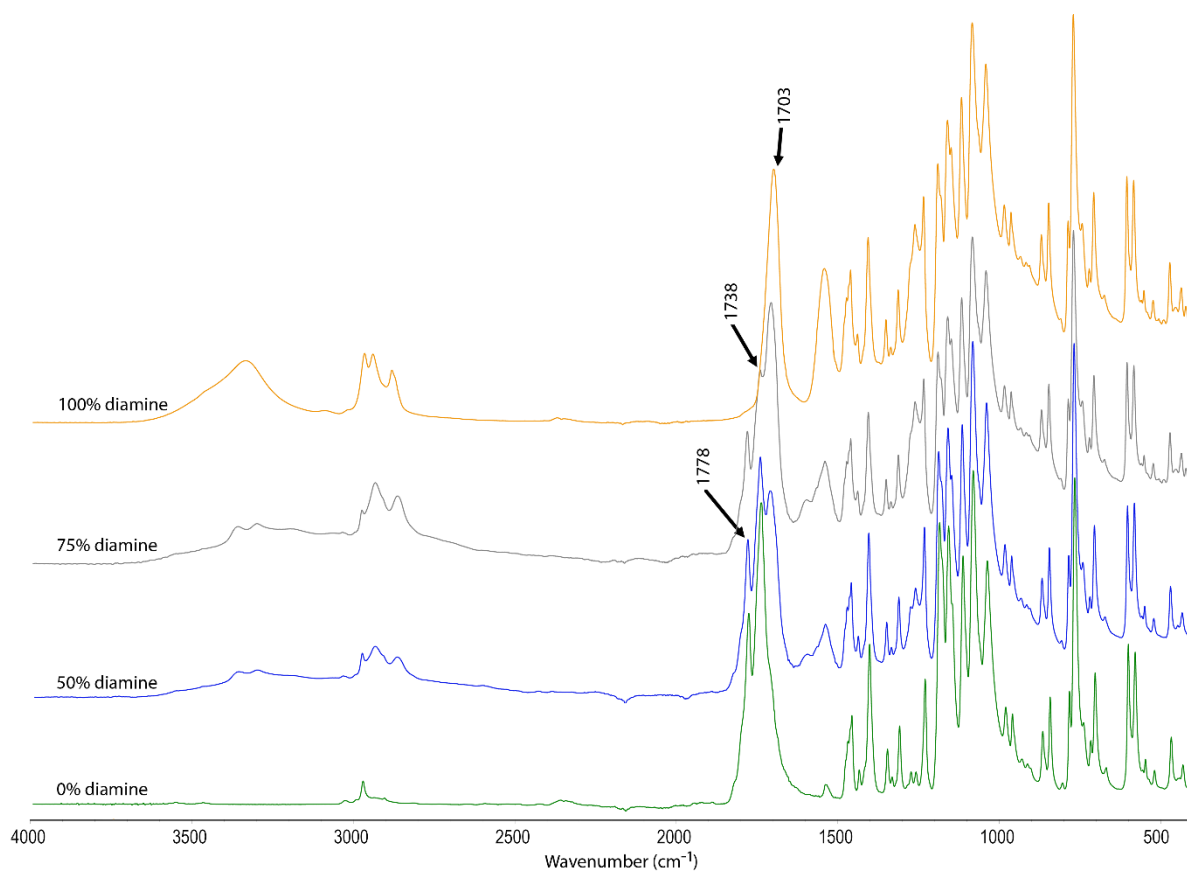

**Figure 7S** FT-IR of poly(hydroxyurethane)s formation
